# Supplementary material for: Short-Term Effects of Anthropogenic Disturbances on Stand Structure, Soil Properties, and Vegetation Diversity in a Former Virgin Mixed Forest
Source: MDPI journal article supplement (doi:10.3390/f14040742), 2023-04-04
Supplement: s1 [file s1]

**Table S1.** Natural regeneration per forests types, species, and regeneration circle (RC1—5 m<sup>2</sup> for seedlings with height of 10-39.9 cm; RC2- 10 m<sup>2</sup> for saplings 40-129.9 cm in height; RC3- 20 m<sup>2</sup> for saplings with height >130 cm and dbh<6 cm) (N ha<sup>-1</sup>mean±standard error). Minimum and maximum values (indicated in brackets) correspond to average of the four regeneration sub-plots per plot.

| Regeneration species       | RC1 (N ha <sup>-1</sup> ) |                     | RC2 (N ha <sup>-1</sup> ) |                  | RC3 (N ha <sup>-1</sup> ) |                  | TOTAL (N ha <sup>-1</sup> ) |               |
|----------------------------|---------------------------|---------------------|---------------------------|------------------|---------------------------|------------------|-----------------------------|---------------|
|                            | virgin                    | Former virgin       | virgin                    | Former virgin    | virgin                    | Former virgin    | virgin                      | Former virgin |
| <i>Fagus sylvatica</i>     | 2639<br>(0-9778)          | 2194<br>(444-10000) | 1458<br>(0-3444)          | 1264<br>(0-4444) | 1576<br>(500-3333)        | 2007<br>(0-5000) | 5673                        | 5465          |
| <i>Abies alba</i>          | 111<br>(0-444)            | 806<br>(0-5333)     | 14<br>(0-111)             | 153<br>(0-1111)  | 160<br>(0-278)            | 111<br>(0-611)   | 285                         | 1070          |
| <i>Acer pseudoplatanus</i> | 22<br>(0-222)             | -                   | -                         | -                | -                         | 14<br>(0-111)    | 22                          | 14            |
| <i>Picea abies</i>         | -                         | -                   | 14<br>(0-111)             | -                | 21<br>(0-167)             | 14<br>(0-111)    | 35                          | 14            |
| <i>Populus tremula</i>     | -                         | 167<br>(0-167)      | -                         | 14<br>(0-111)    | -                         | -                | -                           | 181           |
| Total regeneration         | 2772                      | 3167                | 1486                      | 1431             | 1753                      | 2146             | 6015                        | 6744          |
